# Supplementary material for: Recreational drug inhalation and socioenvironmental determinants of pulmonary infection in patients with HIV: a hospital-based case control study
Source: Research Square preprint supplement (doi:10.21203/rs.3.rs-8695194/v1), 2026-02-23
Supplement: Supplementary file 1 [file cd8b6b26b9a325feb1821060.docx]

**Inhaled Exposures Questionnaire**

**ENROLLMENT INFORMATION**

1. Study ID (id):

2. Participant Location: (inpt)

Outpatient: 0

Inpatient: 1

3. If inpatient, date of admission ____/____/____ (MM/DD/YY) (doa)

4. Today’s date ____/____/____ (MM/DD/YY) (doe)

5. Suspected pulmonary infection? (pna)

No: 0

Yes: 1

**DEMOGRAPHICS**

6. What is your date of birth? |___|___|-|___|___|-|___|___|___|___| (MM/DD/YYYY) (dob)

7. What is your sex (at birth)? (male)

Female: 0

Male: 1

8. Are you Hispanic or Latino/Latina? (hisp)

No: 0

Yes: 1

9. Which of the following categories best describes you? (race)

White…………………………………………………………………….……….1

African American or Black………………………………………..…….2

Asian………………………………………………………………………….…..3

Native Hawaiian/ Pacific Islander………………..……..………….4

American Indian or Alaska Native……………………….………...5

Other/Not Specified……………………………………….……………..99

10. What is the highest level of education you have completed? (edu)

Less than 9th grade…………………………….1

Grade 9-11 (no high school diploma)….2

GED…………………………………………………….3

High School Diploma…………………………..4

Some College or Technical School….……5

College or University Degree……….……..6

Post Graduate studies…………………………7

Refused/UNKNOWN……………………………99

11. What is your current marital status? (partner)

Single (never married)……………………….1

Member of Unmarried Couple…………..2

Married………………………………………………3

Separated…………………………………………..4

Divorced…………………………………………….5

Widowed…………………………………………….6

Refused/UNKNOWN………………………….99

12. What is your current annual household income from all sources? (income)

Less than $10,000……………………………..1

$10,001 to $20,000……………………………2

$20,001 to $30,000……………………………3

$30,001 to $40,000…………………..……….4

Over $50,000……………………………..………5

Refused/ Unknown…………………… ..….99

13. Which of the following describes your current living situation?

Home is owned or being bought by you or someone else living in the home..1

Home is rented by you or someone else living in the home…………………………..2

You currently live in the home without cash payment or rent………………….…...3

Homeless……………………………………………………………………………………………………….4

Nursing home or rehabilitation facility…………………………………………………………..5

UNKNOWN…………………………………………………………………………………………………..99

**GENERAL HEALTH**

14. Have you been on antiretroviral medication in the last month? (arv)

No: 0

Yes: 1

15. Have you been hospitalized with a lung infection in the last 3 months (separate from current admission)? (pnarec)

No: 0

Yes: 1

**HOME EXPOSURES**

16. Residential address

a. Do you have a stable home address? (a place where you have lived for at least the last month) (housed)

No: 0

Yes: 1

(if a=1 then skip to e)

b. What is your most recent sleeping location? (address or intersection) ______________________(addresssleep)

c. How many days have you stayed at this location? ____________________________(sleepdays)

d. Over the last month where have you slept most often? _________________________(addressoften)

e. Home address (addresshome)

Street address _____________________________________

Level from street (B=below street, 1=street level, 2=2nd floor, etc): B,1,2,3,4,5,6,7,8,9,>10

17. Primary cooking method where you live (cook)

Gas…………….…………...1

Electric..…………………..2

Microwave…..…..……..3

No cooking …………….4

Other (list)……………….5_________________________

18. How many hours per day do you have the windows open, on average? ____ hours (window)

19. Have you burned wood in your home within the last month? (wood)

No: 0

Yes: 1

**Recreational Drug Smoking EXPOSURES**

**Tobacco**

20. a. Have you ever smoked tobacco? (at least 100 cigarettes, 20 cigars, or 20 pipes) in your life? (tobever)

No: 0

Yes: 1

(if “No” then skip to e)

b. If so, how old were you when you started? ___ years old (tobage)

c. From then to present, how many years have you smoked for? (not including years in which you quit) _____years (tobyrs)

d. How many cigarettes have you smoked per day on average over the entire time you have smoked? _____ cigs/day (cigsday)

e. About how many cigarettes per day have you smoked in the past month? _____ cigs/day (cigdose)

f. Have you smoked non-cigarette tobacco in the last month (pipe, cigar, or hookah)? (tobother)

No: 0

Yes: 1

(If “No”, skip to 21)

g. How many times have you smoked a tobacco pipe in the last month? ______ times/month (pipedose)

h. How many times have you smoked a cigar in the last month? ______ times/month (cigardose)

i. How many times have you smoked tobacco in a Hookah in the last month? ______ times/month (hoodose)

**Second Hand Smoke**

21. How many hours per day have you spent around people smoking over the last month? _______ hrs/day (shs)

**E-cigarettes** (inclusive of electronic cigarettes, personal vaporizers, electronic nicotine delivery systems―any device that vaporizes a liquid solution for inhalation)

22. Have you ever smoked e-cigarettes? (ecigever)

No: 0

Yes: 1

(if “No”, skip to 25)

23. If so, have you smoked e-cigarettes in the last month? (ecignow)

No: 0

Yes: 1

(If “No”, skip to 25)

24. How many times have you smoke e-cigarettes in the last month? _______ times/day (ecigdose)

**Marijuana**

25. Have you ever smoked marijuana? (eating it doesn’t count) (mjever)

No: 0

Yes: 1

(If “No”, skip to 29)

26. If so, how do you most commonly smoke marijuana? (mjtype)

Joint: 1

Pipe: 2

Hookah: 3

Other (specify): 4 ________

27. Have you smoked marijuana in the last month? (mjnow)

No: 0

Yes: 1

(If “No”, skip to 29)

28. How many times have you smoke marijuana in the last month? _______ times/month (mjdose)

**Crystal Methamphetamine**

29. Have you ever smoked or snorted meth? (IV use doesn’t count) (methever)

No: 0

Yes: 1

(If “No”, skip to 33)

30. If so, have you smoked or snorted meth in the last month? (methnow)

No: 0

Yes: 1

(If “No”, skip to 33)

31. How many times have you smoke or snorted meth in the last month? _______ times/month (methdose)

32. How many grams of meth have you smoked or snorted in the last month? ______ grams/month (methgram)

**Crack Cocaine** (inclusive of ready rock or freebase cocaine)

33. Have you ever smoked crack? (crackever)

No: 0

Yes: 1

(If “No”, skip to 36)

34. If so, have you smoked crack in the last month? (cracknow)

No: 0

Yes: 1

(If “No”, skip to 36)

35. How many times have you smoke crack in the last month? _______ times/month (crackdose)

**Cocaine** (by snorting)

36. Have you ever snorted cocaine? (cocever)

No: 0

Yes: 1

(If “No”, skip to 39)

37. If so, have you snorted cocaine in the last month? (cocnow)

No: 0

Yes: 1

(If “No”, skip to 39)

38. How many times have you smoked cocaine in the last month? _______ times/month (cocdose)

**IVDU**

39. When, if ever, did you last inject drugs? (ivdu)

Never: 0

Greater than 1 year ago: 1

Within the last year, but greater than 1 month ago: 2

Within the last month: 3

**Occupational EXPOSURES**

40. What is your current employment status? (job)

Employed for wages full-time (> 35 hours/week)…1

Employed for wages part-time (<35 hours/week)…2

Homemaker……………………………………………………………3

Full-time student…………………………………………………….4

Self-employed………………………………………………………..5

Retired……………………………………………………………………6

Unemployed <1 year……………………………………………….7

Unemployed > 1year……………………………………………….8

Disabled…………………………………………………………………..9

Refused/UNKNOWN…………………………..…………………..99

41. Have you been employed within the last 1 month? (worknow)

No: 0

Yes: 1

(If “No”, skip to 47)

42. Primary work address in last 1 month (if multiple locations, pick where you are at predominantly) (workaddress)

Street address or intersection________________________________

Level from street: B,1,2,3,4,5,6,7,8,9,>10

43. Average hours per week spent at work__________ (workhrs)

44. Work exposure:

a. What is your job?_______________________________________________________________ (worktype)

b. Does your job expose you to vapor, dust, gas or fumes? (workexp)

No: 0

Yes: 1

c. Describe the exposure (workexptype)

Type_______________________________________________________________________

Number of hours per day of exposure ___________ hours/day (workexphrs)

Number of days per week of exposure___________ days/week (workexpdays)

45. Primary method of commuting to work (commute)

MUNI (bus or trolley)….…1

BART (subway)……………...2

Personal car or car pool….3

Biking……………………………..4

Walking……………………….….5

Other (list)……………………..6_______________________________________

46. Average number of hours spent commuting each day__________ hours/day (commutehrs)

**INHALER EXPOSURE**

47. a. Have you used inhaled corticosteroids within the last month? (show inhaler chart) (inhaler)

No: 0

Yes: 1

b. Name of inhaler #1 _________ (inh1)

How often have you used inhaler #1 in the last month? (inh1use)

Not at all: 0

Occasionally (at least once in the last month but less than daily): 1

At least once a day: 2

c. Name of inhaler #2 __________ (inh2)

How often have you used inhaler #2 in the last month? (inh2use)

Not at all: 0

Occasionally (at least once in the last month but less than daily): 1

At least once a day: 2

d. Name of inhaler #3 __________ (inh3)

How often have you used inhaler #3 in the last month? (inh3use)

Not at all: 0

Occasionally (at least once in the last month but less than daily): 1

At least once a day: 2

General comments: (comment) _______________________________________________________________________________________________________________________________________________________________________________________________________________________________________________________________________________________________________________________

_______________________________________________________________________________________________________

________________________________________________________________________________________________________

Interviewer name: (interviewer) __________________________________________________
